# Supplementary material for: Apoptotic Activity of New Oxisterigmatocystin Derivatives from the Marine-Derived Fungus Aspergillus nomius NC06
Source: MDPI journal article supplement (doi:10.3390/md19110631), 2021-11-11
Supplement: s1 [file s1]

# Apoptotic Activity of New Oxisterigmatocystin Derivatives from the Marine-Derived Fungus *Aspergillus nomius* NC06

Muh. Ade Artasasta <sup>1,2</sup>, Yanwirasti Yanwirasti <sup>3</sup>, Muhammad Taher <sup>4</sup>, Akmal Djamaan <sup>1</sup>, Ni Putu Ariantari <sup>5</sup>, Ru Angelie Edrada-Ebel <sup>6</sup> and Dian Handayani <sup>1,\*</sup>

<sup>1</sup> Laboratory of Sumatran Biota/Faculty of Pharmacy, Andalas University, Padang 25163, Indonesia; muh.ade.artasasta.fmipa@um.ac.id (M.A.A.); akmal djamaan@phar.unand.ac.id (A.D.)

<sup>2</sup> Biotechnology Department, Faculty of Mathematics and Natural Sciences, Universitas Negeri Malang (UM), Malang 65145, Indonesia

<sup>3</sup> Departement of Biomedical, Faculty of Medicine, Andalas University, Padang 25163, Indonesia; yanwirasti@yahoo.com

<sup>4</sup> Faculty of Pharmacy, International Islamic University Malaysia, Kuantan 25200, Malaysia; mtaher@iiu.edu.my

<sup>5</sup> Department of Pharmacy, Faculty of Mathematics and Natural Sciences, Udayana University, Bali 80361, Indonesia; putu\_ariantari@unud.ac.id

<sup>6</sup> Strathclyde Institute of Pharmacy and Biomedical Sciences, University of Strathclyde, The John Arbuthnott Building, 161 Cathedral Street, Glasgow G4 0RE, UK; ruangelie.edrada-ebel@strath.ac.uk

\* Correspondence: dianhandayani@phar.unand.ac.id; Tel.: +62-751-71682

## Supplementary Information

### Oxisterigmatocystin J (1)

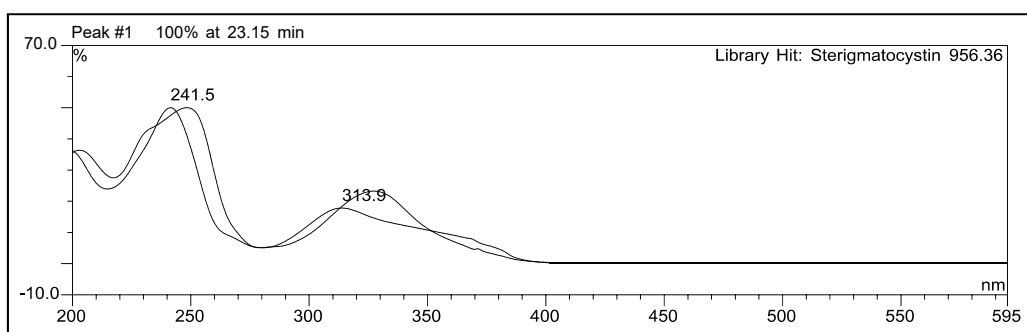

Figure S1. UV spectrum of oxisterigmatocystin J.

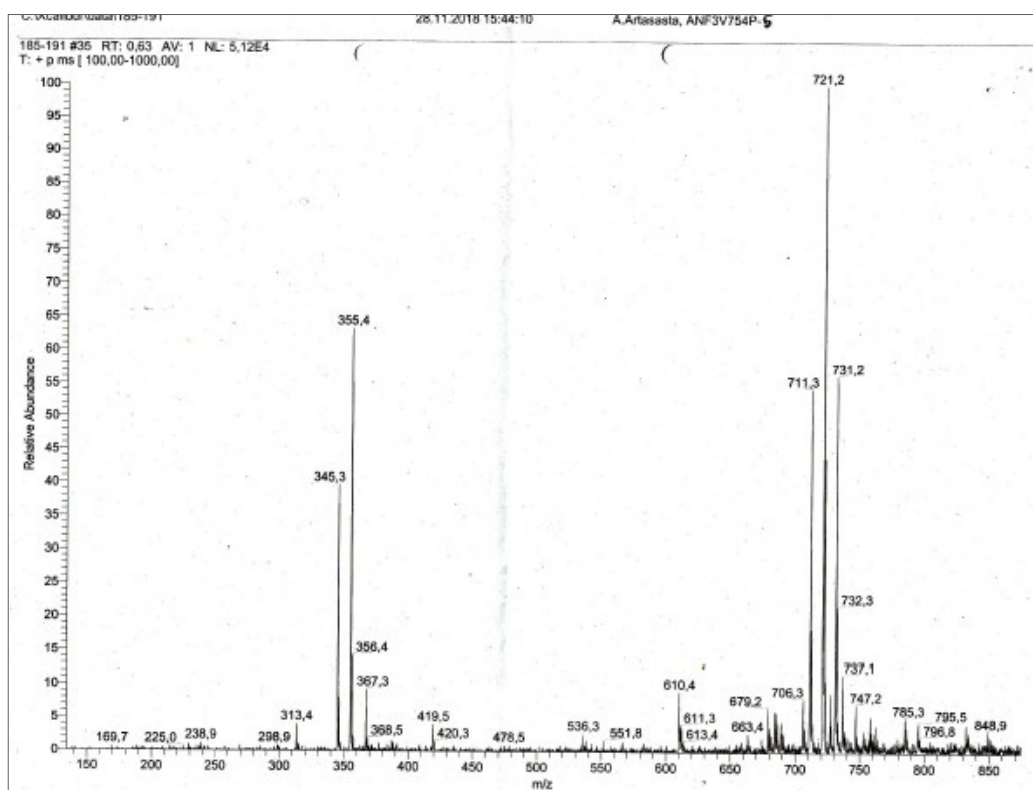

Figure S2. MS spectrum of oxisterigmatocystin J with  $m/z$  ion of  $[M + H]^+$  355.4.



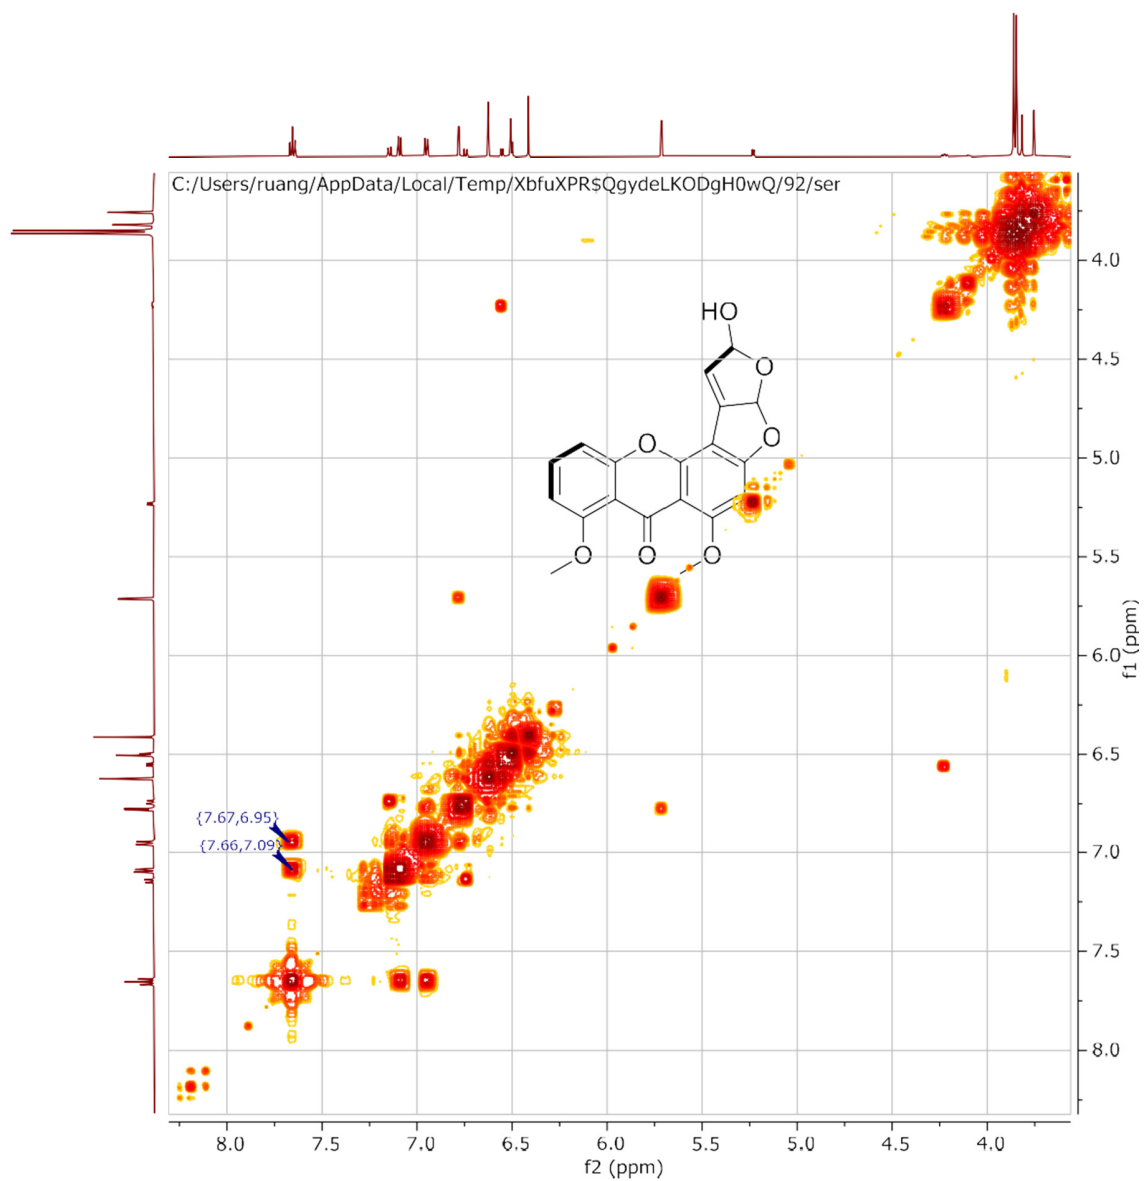

**Figure S4.** COSY spectrum of oxisterigmatocystin J; proton correlations were shown in black thick bonds.

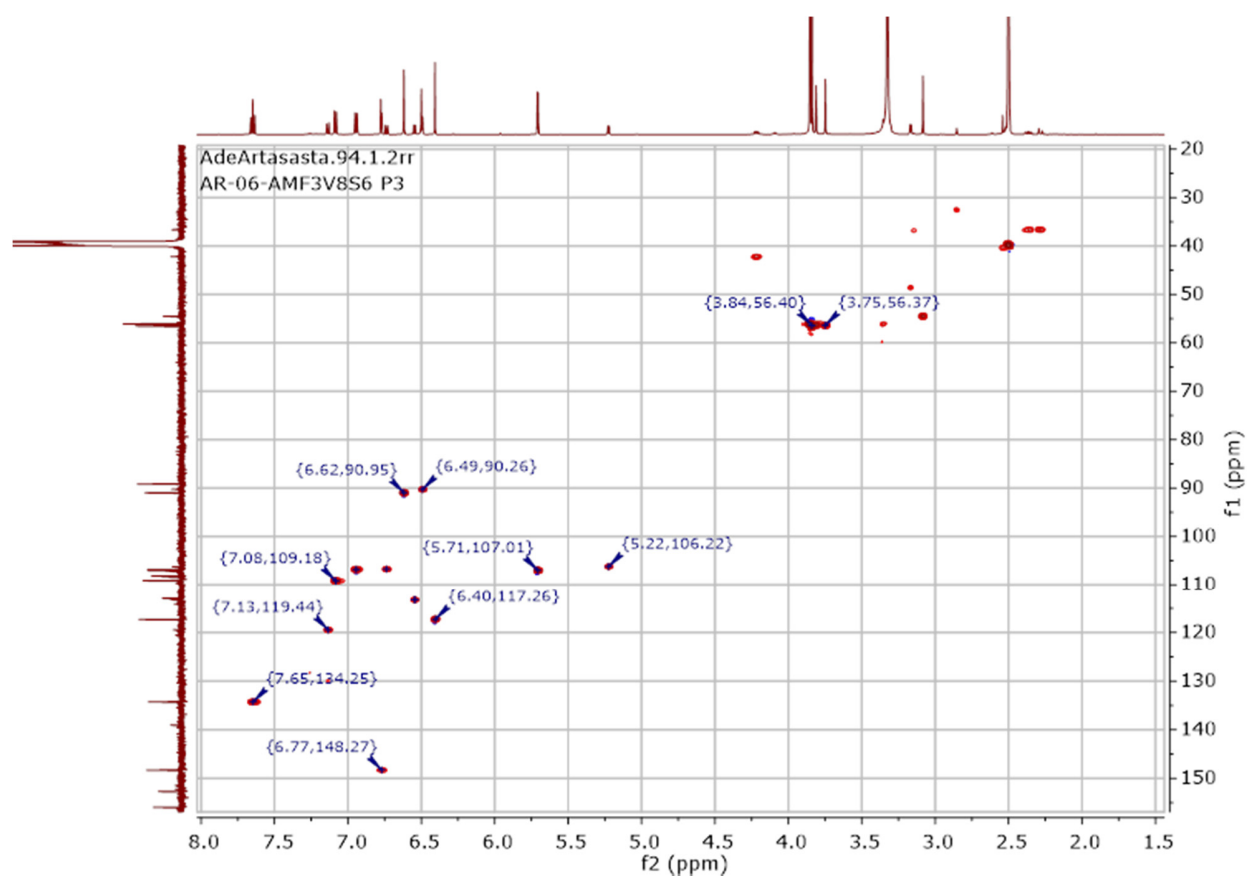

**Figure S5.** HSQC spectrum of oxisterigmatocystin J.

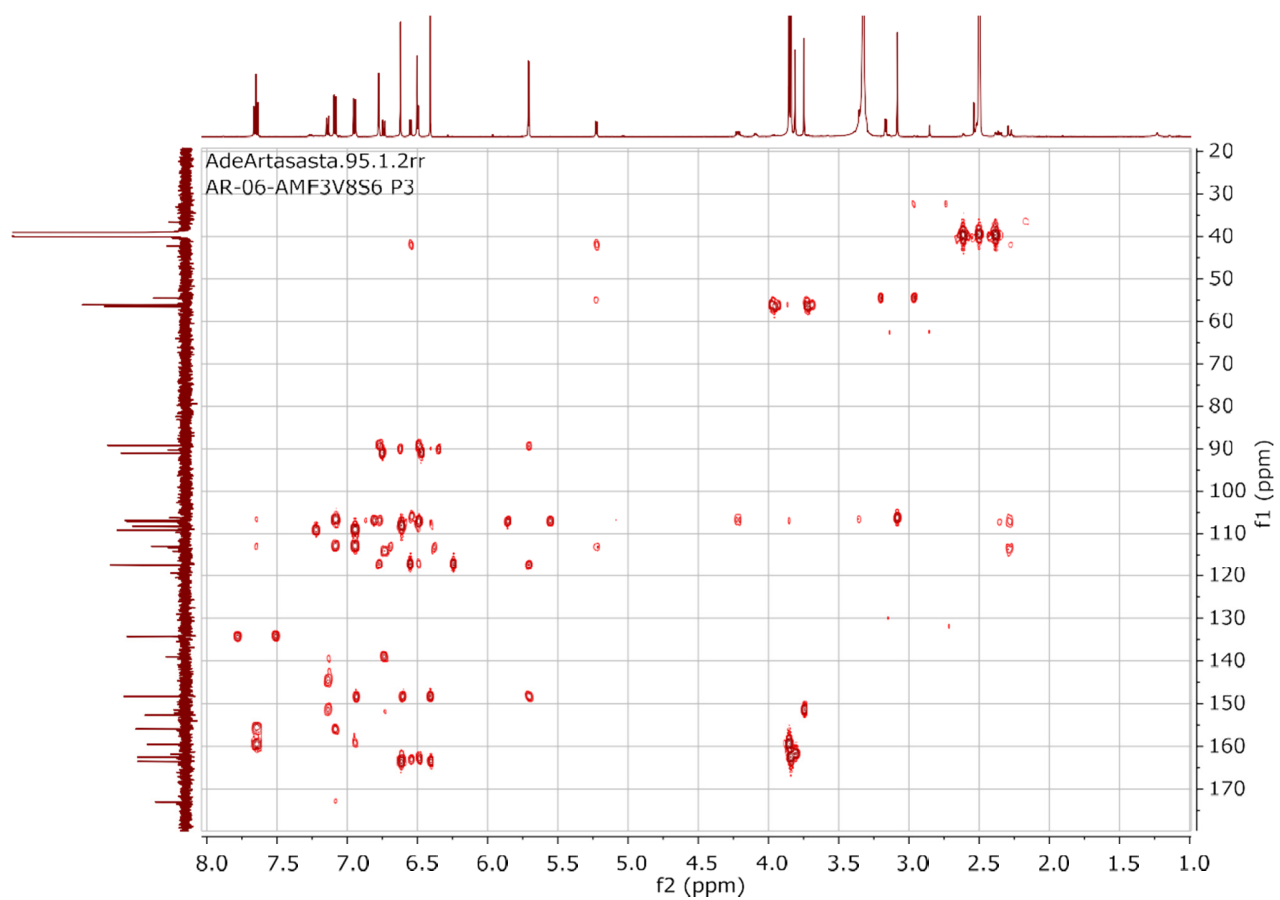

**Figure S6.** HMBC spectrum of oxisterigmatocystin J.

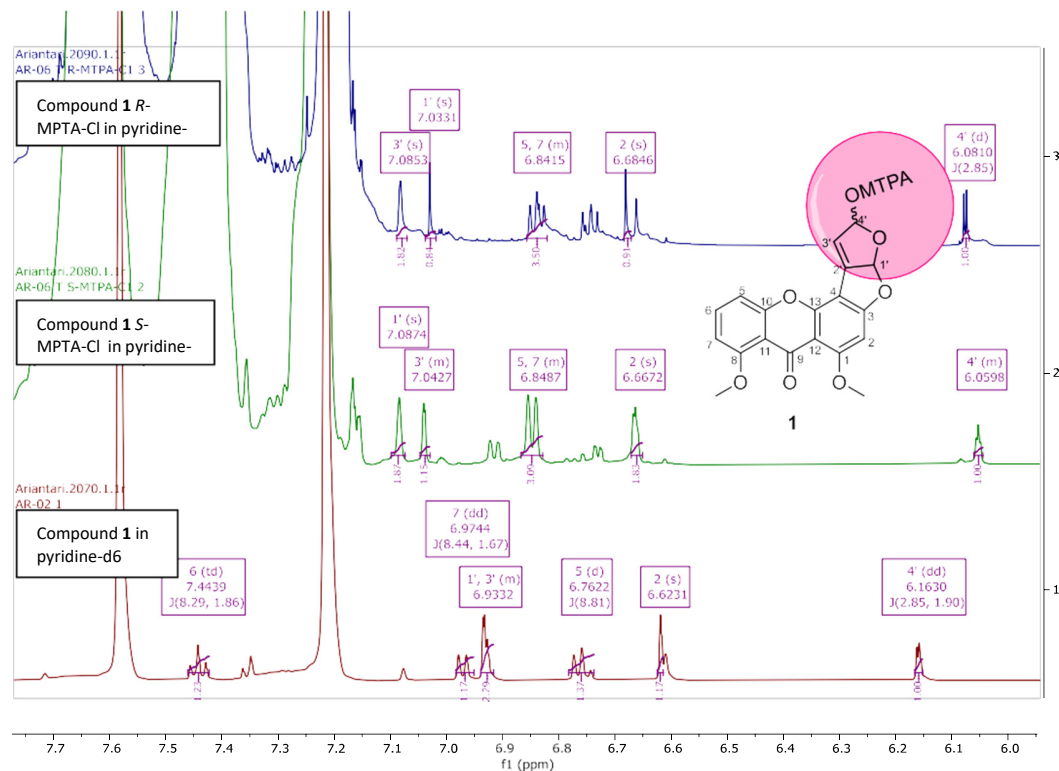

| Protons        | H-1'    | H-3'    |
|----------------|---------|---------|
| ( <i>S</i> )   | 7.0874  | 7.0427  |
| ( <i>R</i> )   | 7.0331  | 7.0853  |
| $S-R =$        |         |         |
| ( <i>S</i> ) – | +0.0543 | -0.0426 |
| ( <i>R</i> )   |         |         |

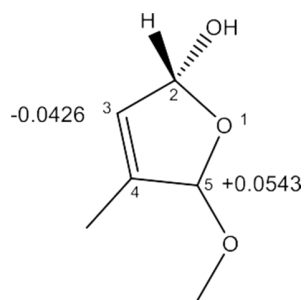

(2*R*)-5-methoxy-4-methyl-2,5-dihydrofuran-2-ol

**Figure S7.** Mosher results for oxisterigmatocystin J (**1**), spectral assignments were confirmed by <sup>1</sup>H-<sup>1</sup>H COSY.

## Oxisterigmatocystin K (2)

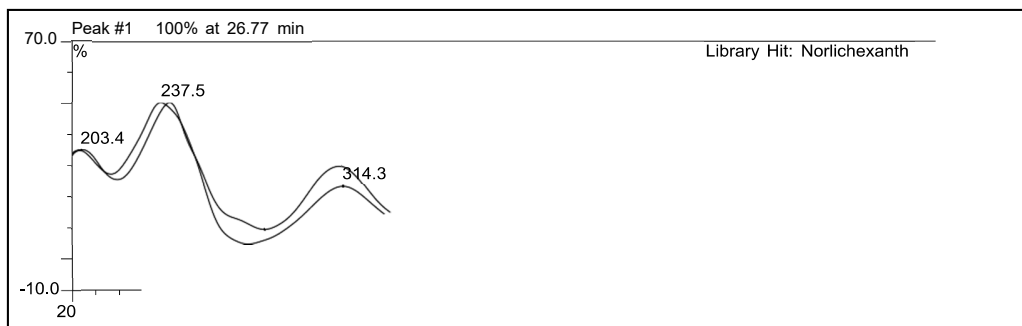

Figure S8. UV spectrum of oxisterigmatocystin K.

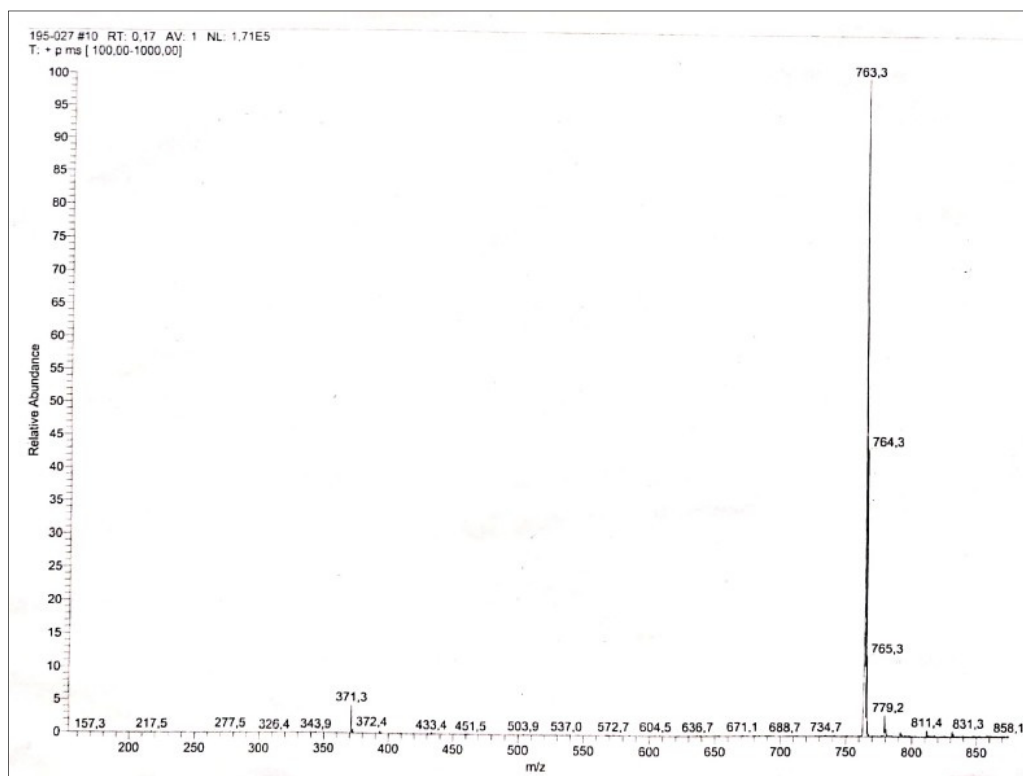

Figure S9. Mass spectrum of oxisterigmatocystin K with m/z ion of  $[M + H]^+$  371.3.



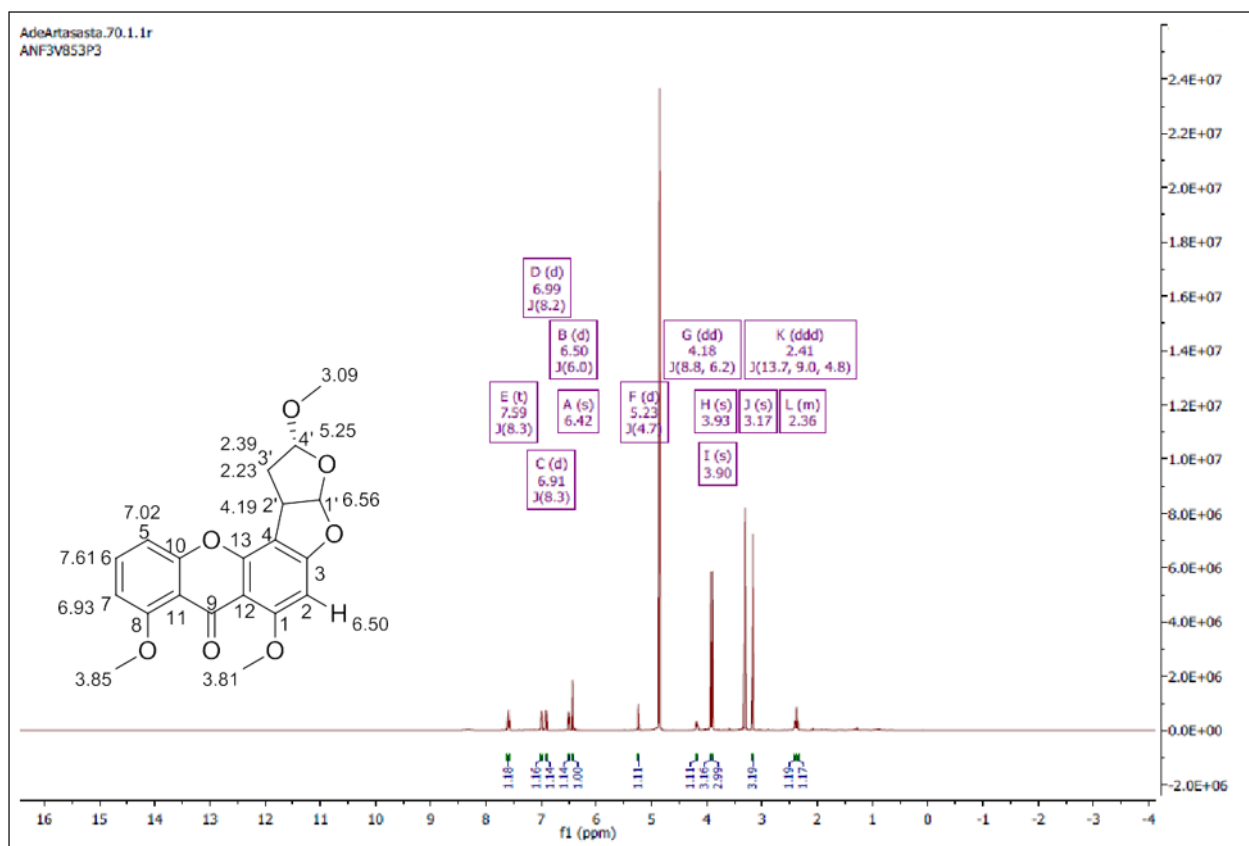

Figure S10. <sup>1</sup>H-NMR spectrum of oxisterigmatocystin K.

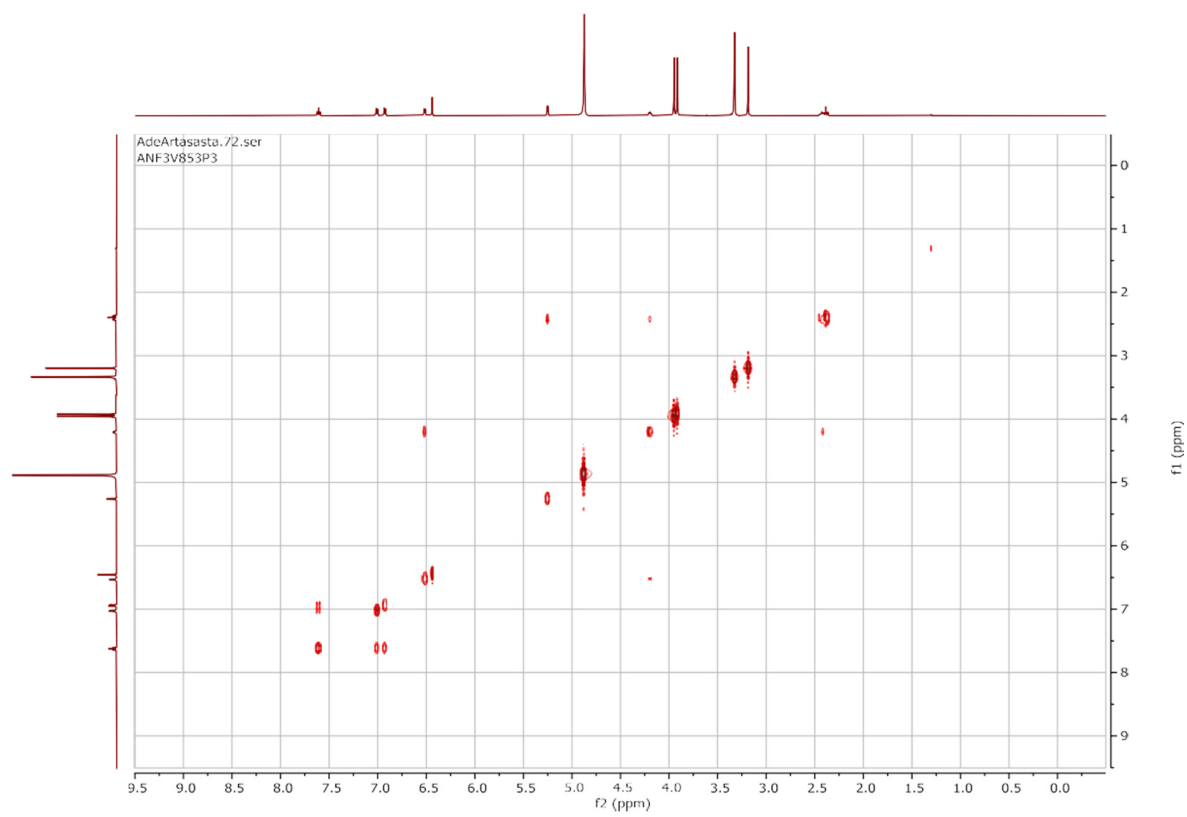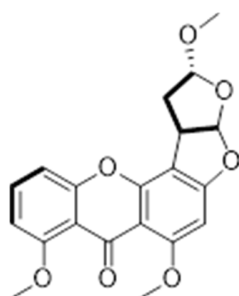

**Figure S11.** COSY spectrum of oxisterigmatocystin K; proton correlations were shown in black.

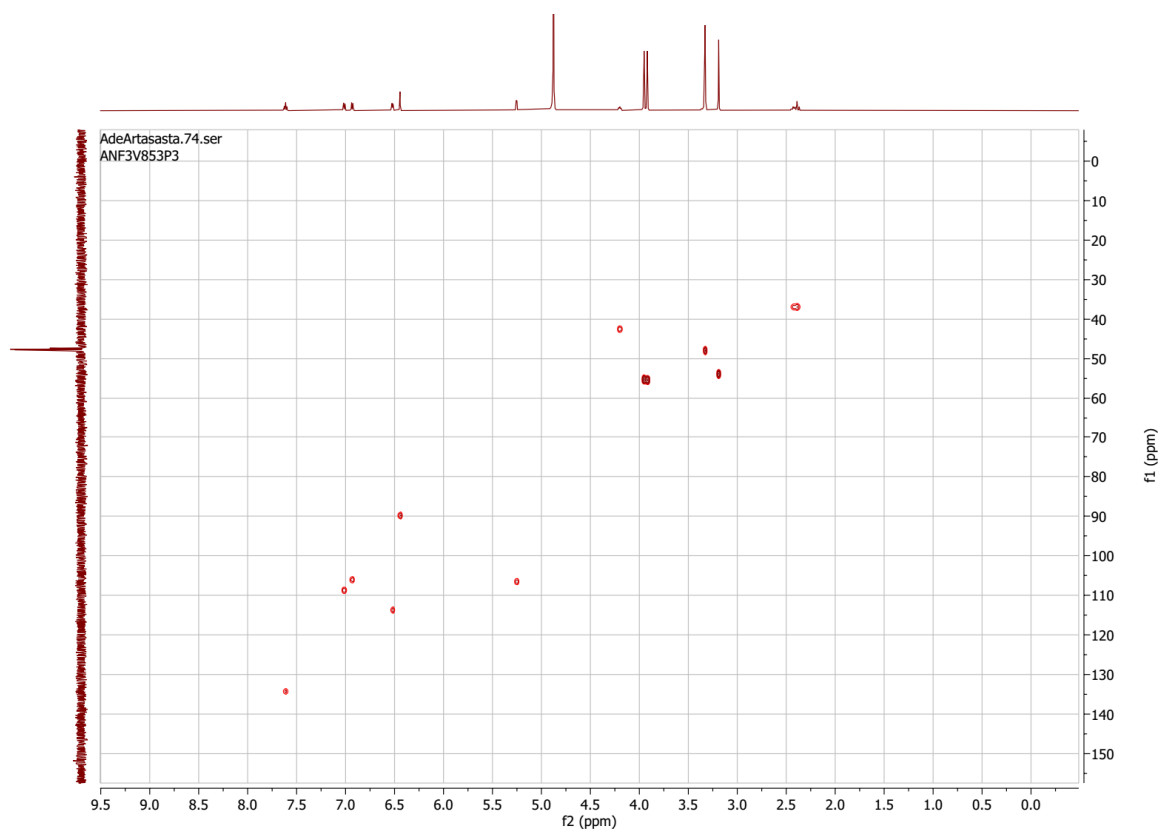

**Figure S12.** HSQC spectrum of oxisterigmatocystin K.

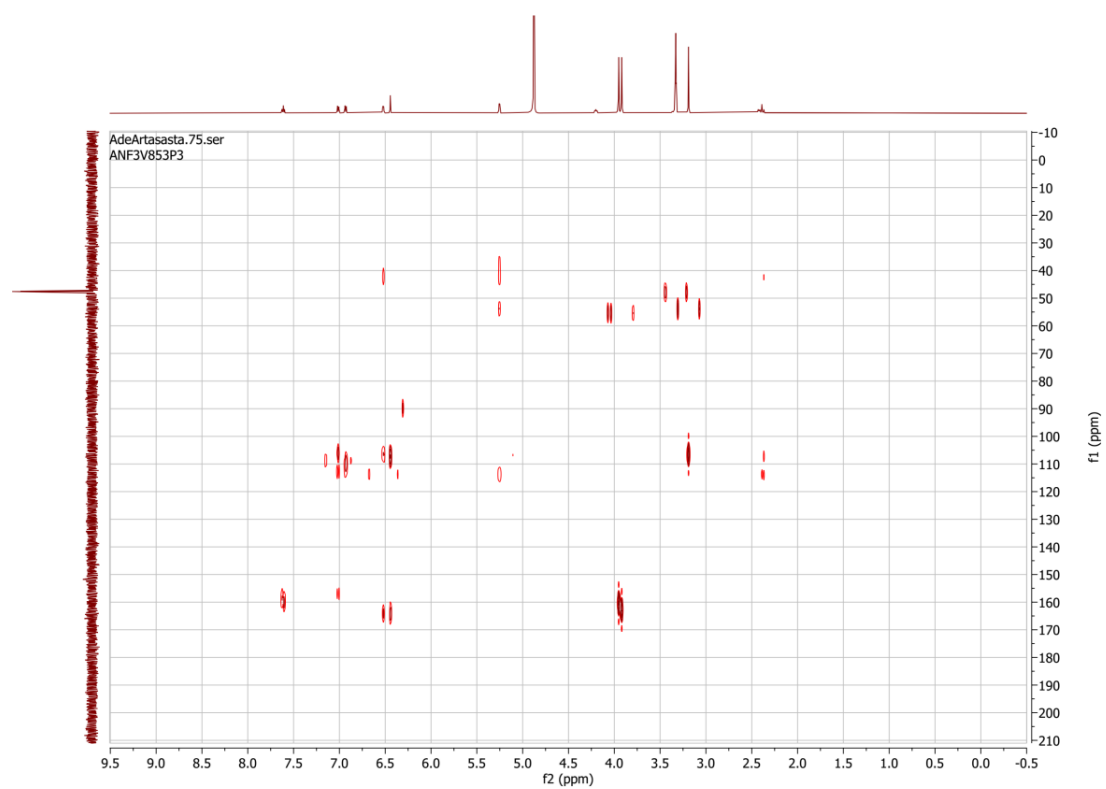

**Figure S13.** HMBC spectrum of oxisterigmatocystin K.

### Oxisterigmatocystin L (3)

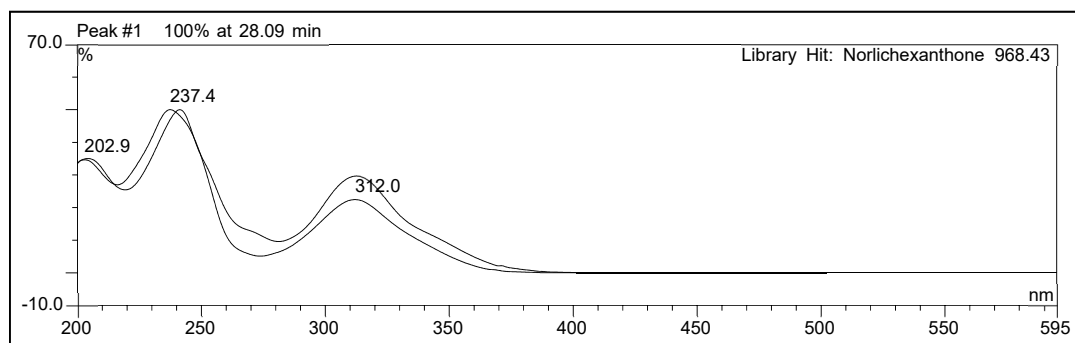

Figure S14. UV spektrum of oxisterigmatocystin L.

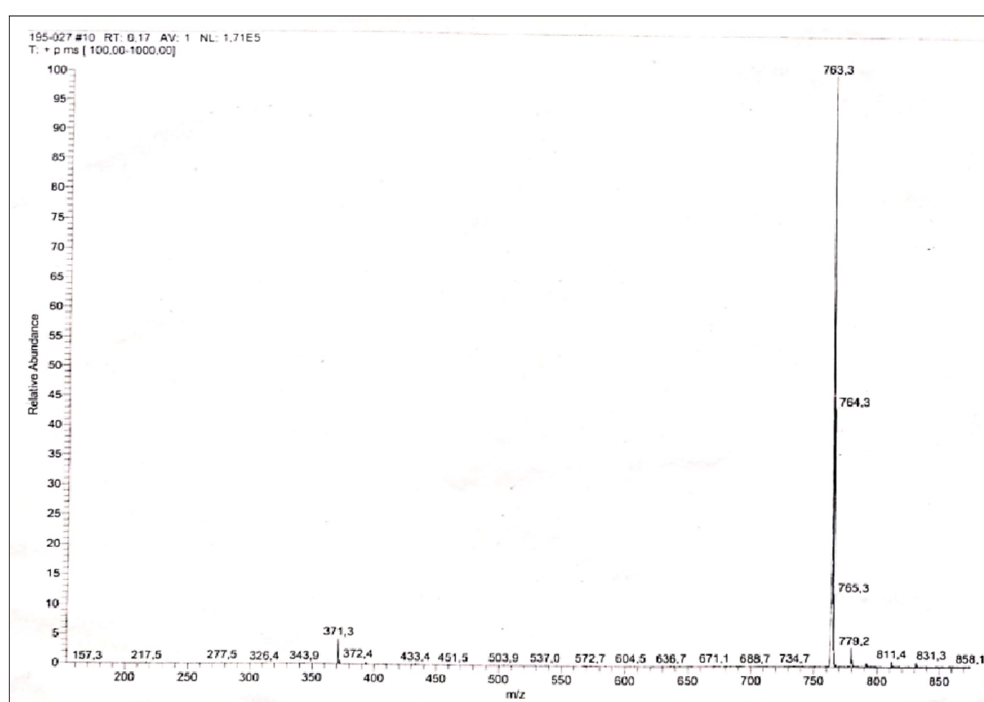

Figure S15. Mass spektrum of oxisterigmatocystin L with  $m/z$  ion of  $[M + H]^+$  371.3.

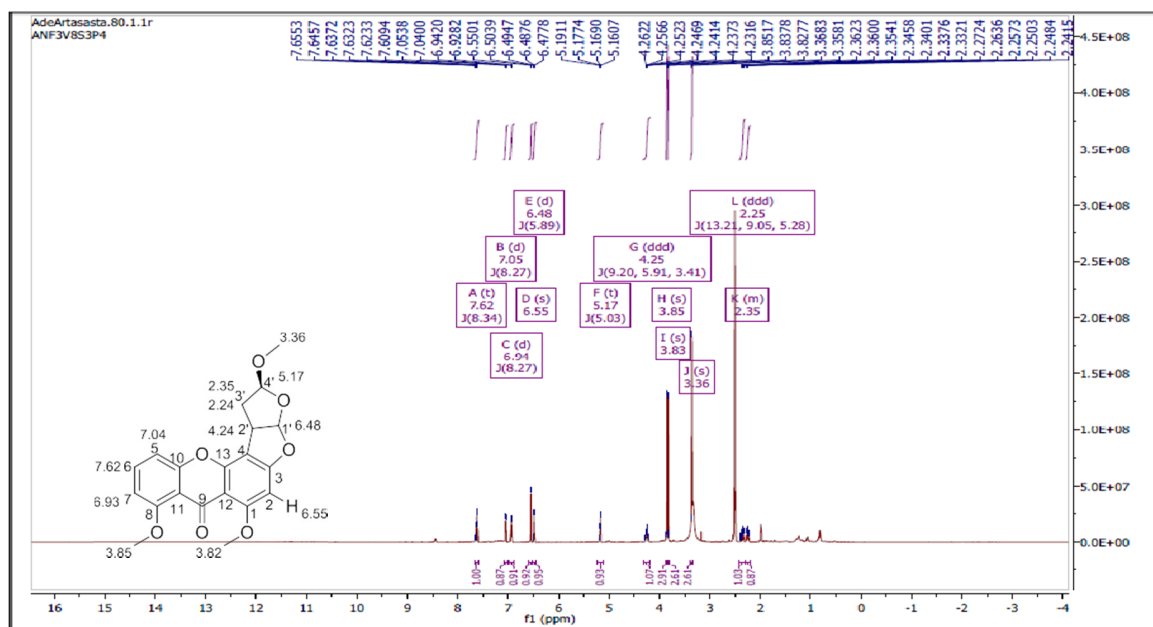

Figure S16. <sup>1</sup>H-NMR spectrum of oxisterigmatocystin.

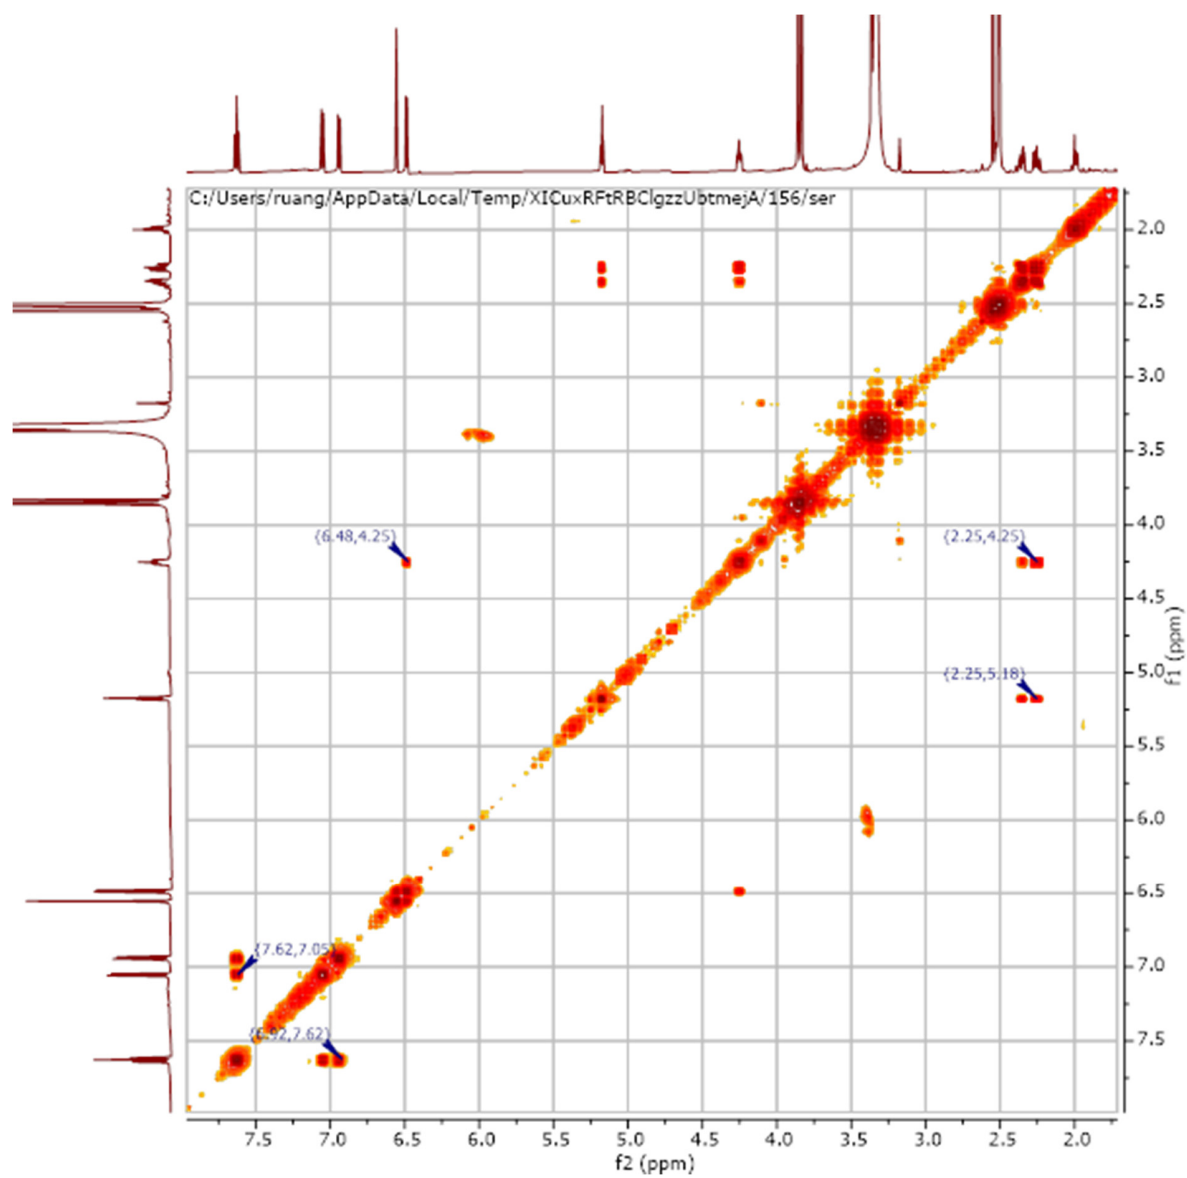

**Figure S17.** COSY spectrum of oxisterigmatocystin L.

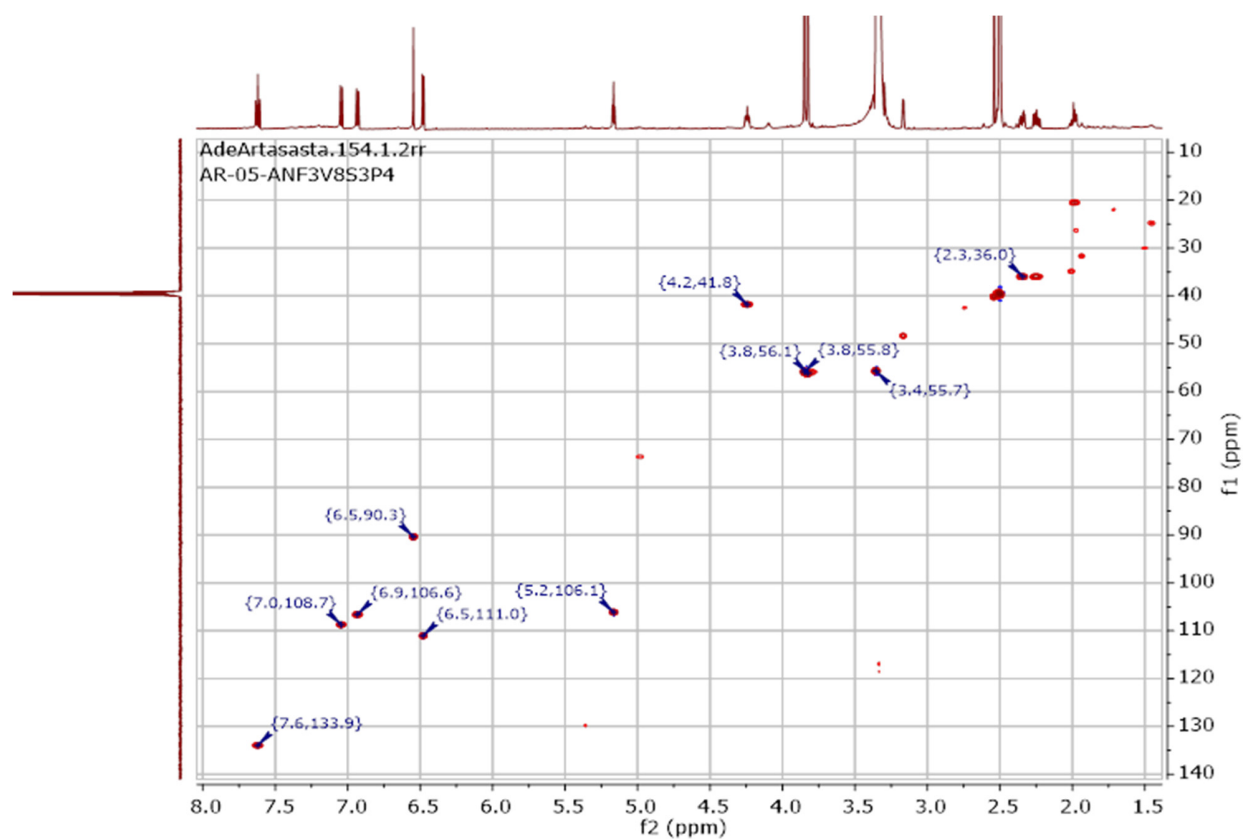

**Figure S18.** HSQC spectrum of oxisterigmatocystin.



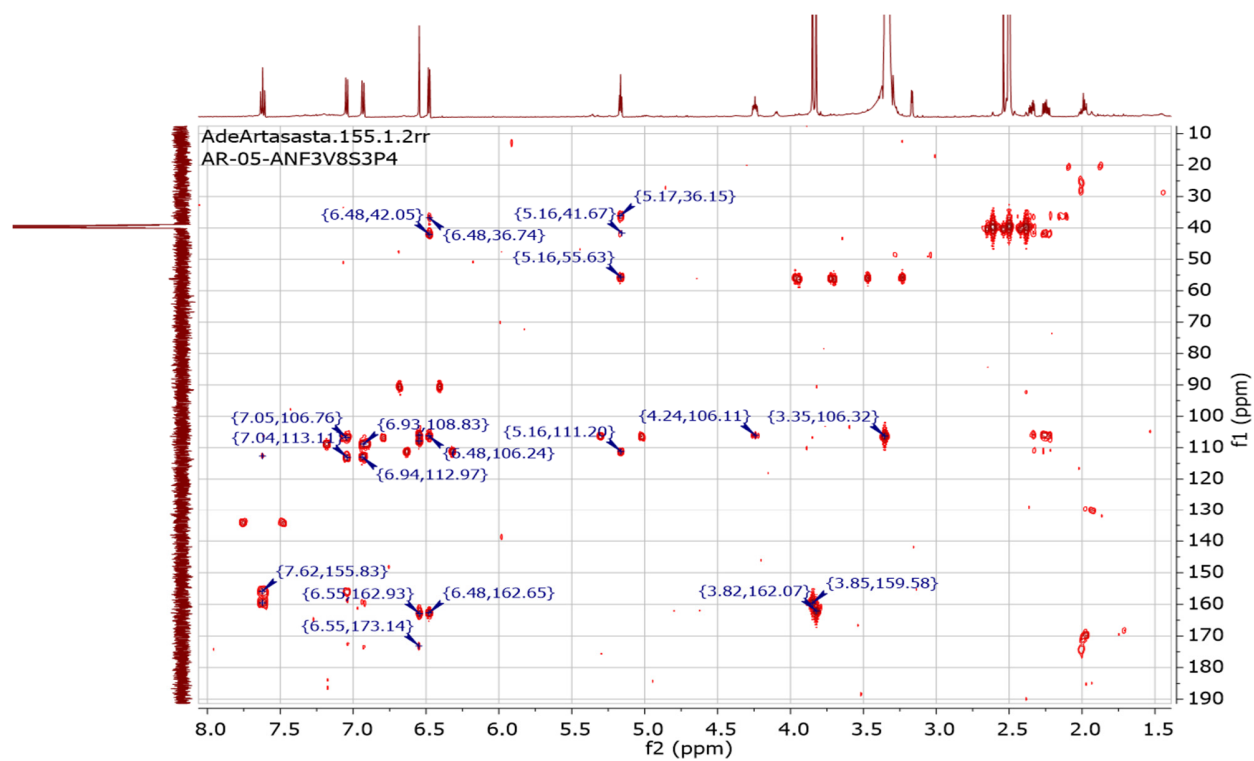

Figure S19. HMBC spectrum of oxisterigmatocystin L.

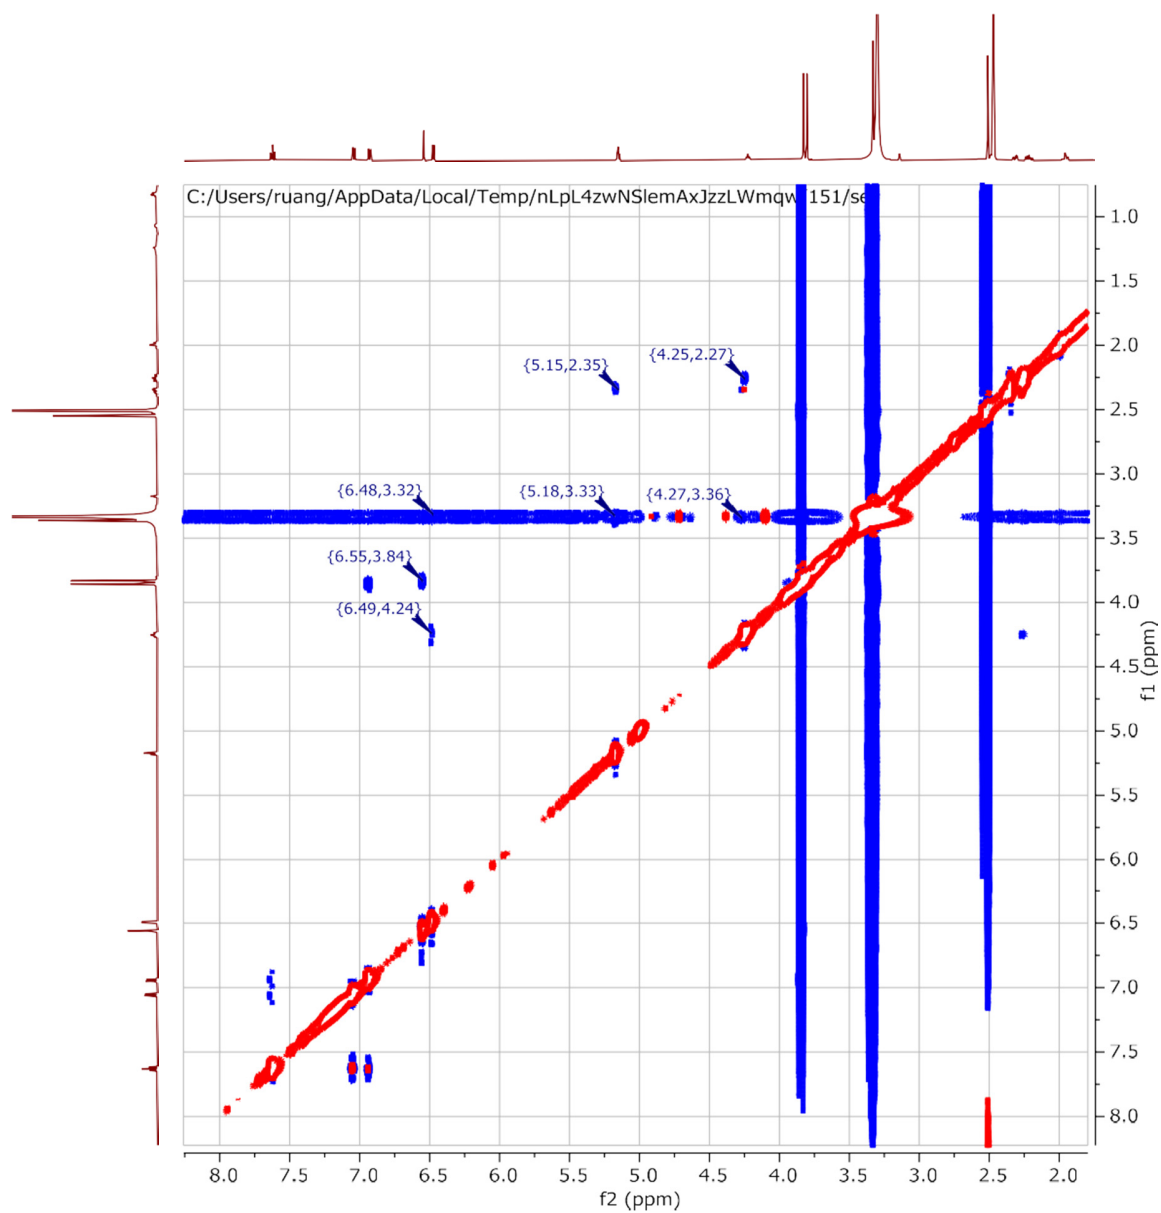

**Figure S20.** NOESY spectrum of oxisterigmatocystin L.

### Aspergillicin A (4)

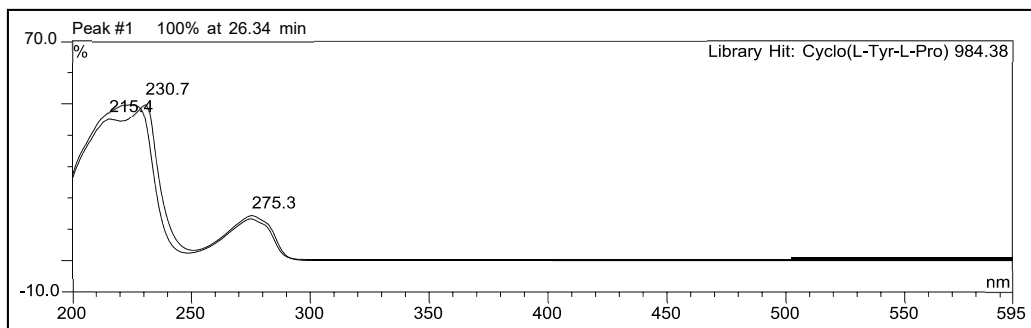

Figure S21. UV spectrum of aspergillicin A.

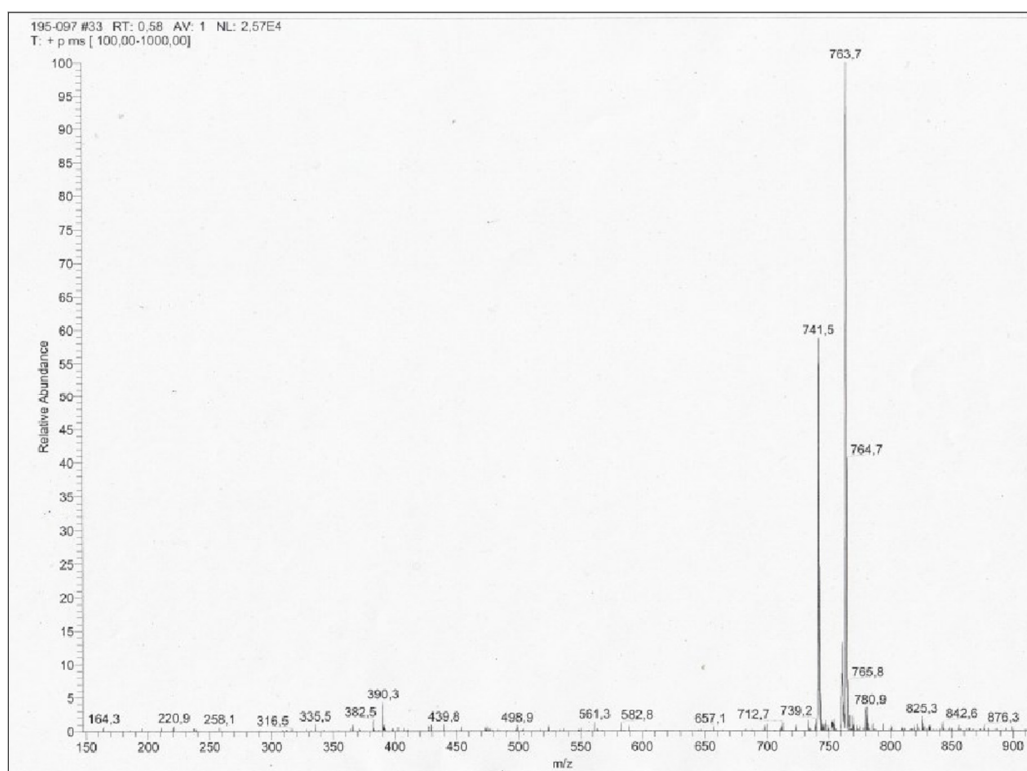

Figure S22. Mass spectrum of aspergillicin A with  $m/z$  ion of  $[M + Na]^+$  763.7.

## Phylogenetic Tree of *A. nomius* NC06

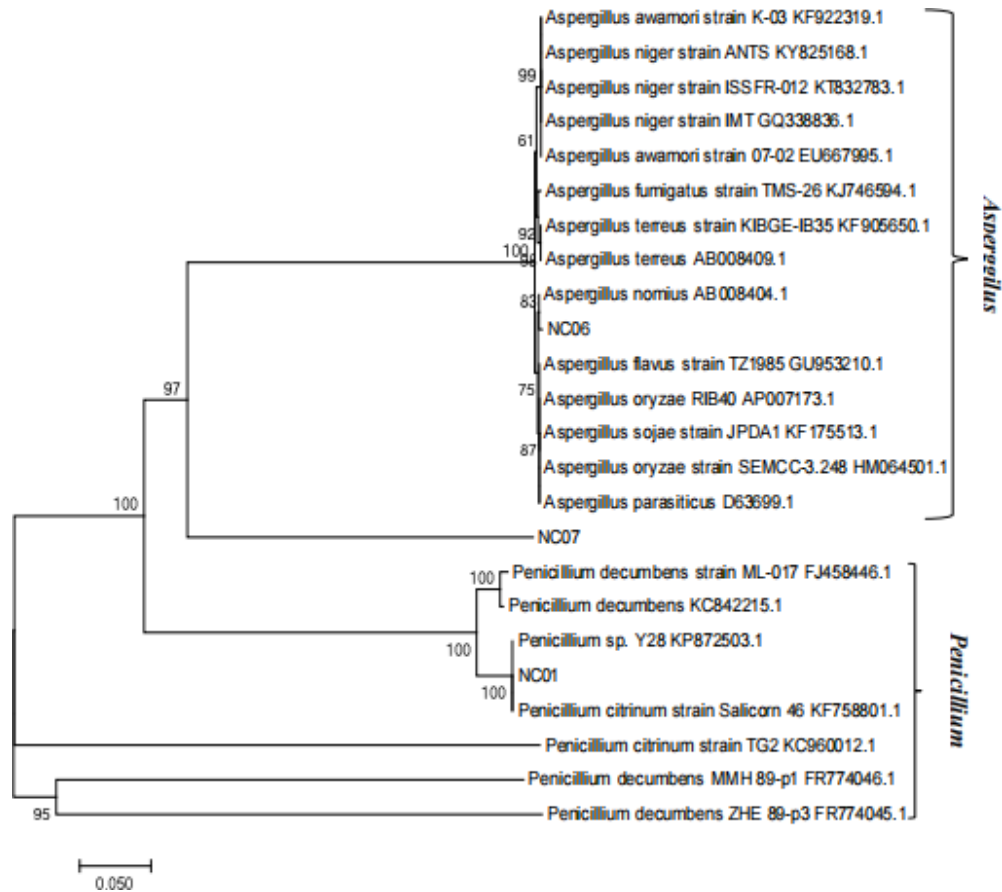

**Figure S23.** The phylogenetic tree by using neighbors-joining method of 18S Rrna.

The sequenced DNA of this fungus has been published on NCBI with accession number MN242781.1 (<https://www.ncbi.nlm.nih.gov/nucleotide/MN242781>).
